# Supplementary material
Source: PubMed Central journal article supplement (PMC3667270)
Supplement: supp_jc.2013-1295_JC-13-1295.pdf [file supp_jc.2013-1295_JC-13-1295.pdf]

## SUPPLEMENTAL RESULTS

We observed that the prevalence of obesity by race/ethnicity in the overall unselected population (n=668) was 16.9% (95% CI: 25.77 to 32.80) in non-HW and 40.2% (35.1 to 45.4) in AA. In turn, the prevalence of obesity in the State of Alabama general female population the study was available for 2001 as 20.0% for non-HW and 35.0% for AA females aged  $\geq 20$  years (**16, 17**). The prevalence of overall obesity for our entire unselected population (29.2% [95% CI: 25.77 to 32.80] was similar to the estimates in the Jefferson County (State of Alabama) during the period of study (24.5 – 26.5 %), based on 1995 to 2000 BRFSS obesity data on Alabama general population (**16, 17**).

Race-specific estimates of prevalence of obesity for referral PCOS, unselected PCOS and unselected controls are presented in **Supplemental Table 1**. Estimates for the prevalence of severe obesity in the overall unselected population (n=668) by race/ethnicity this prevalence was 3.8% (95% CI: 1.9 to 6.7) and 11.4% (8.3 to 15.1) in non-HW and AA, respectively. Estimates for the prevalence of severe obesity were not available for the State of Alabama during the period of study.

The prevalence of obesity in non-HW and AA referral PCOS women was 3.7-fold and 1.8- fold greater ( $p < 0.0001$ ), respectively, than estimates for the same in the overall unselected population, and 3.1-fold and 2.1-fold greater ( $p < 0.0001$ ), respectively, than the estimates for the State of Alabama for the same time period. Alternatively, the prevalence of obesity in unselected PCOS women and unselected controls by race/ethnicity were similar to the prevalences in the overall unselected population and for general adult female population in the State of Alabama (**Fig. 3**).

The prevalence of severe obesity in the referral PCOS cohort was 3 to 4-fold greater than the estimates in the overall unselected population by of race (**Supplemental Table 1**). Alternatively, the prevalence of severe obesity in unselected controls was similar to the estimates in the overall unselected population, and higher in AA subjects. The prevalence of severe obesity in the unselected PCOS by race/ethnicity was not compared with the estimates in unselected general population because of small sample size.

Supplementary Table 1. Impact of racial/ethnic disparities on demographics, androgens and obesity

| Study Group         | Race               | Age (years)* | BMI (kg/M <sup>2</sup> )* | mFG score*           | Androgen levels <sup>z,f</sup> |                                |                               |                            | Hirsutism (%)<br>mFG score<br>≥ 6 | Hyperandrogenemia (%) |                        |                      | Prevalence of obesity    |                         |
|---------------------|--------------------|--------------|---------------------------|----------------------|--------------------------------|--------------------------------|-------------------------------|----------------------------|-----------------------------------|-----------------------|------------------------|----------------------|--------------------------|-------------------------|
|                     |                    |              |                           |                      | DHEAS (ng/mL)                  | Total T (ng/dl)                | Free T (ng/dl)                | SHBG <sup>g</sup> (nmol/L) |                                   | DHEAS (>2459 ng/mL)   | Total T (>84.70 ng/dl) | Free T (>0.75 ng/dl) | General n (%)            | Severe n (%)            |
| Referral PCOS       | All                | 27.4±0.4     | 34.5±0.6 <sup>a</sup>     | 8.0±0.3 <sup>a</sup> | 1948 (92-6692) <sup>a</sup>    | 77.9 (14.0-586.0) <sup>a</sup> | 0.83 (0.10-4.09) <sup>a</sup> | 164 (100-670) <sup>a</sup> | 72.3 <sup>d</sup>                 | 35.7 <sup>d</sup>     | 39.0 <sup>d, e</sup>   | 64.0 <sup>a</sup>    | 186 (63.7%) <sup>a</sup> | 81 (27.7%) <sup>a</sup> |
|                     | non-Hispanic White | 27.5±0.5     | 34.3±0.6 <sup>a</sup>     | 7.7±0.3 <sup>a</sup> | 1970 (92-6692) <sup>a</sup>    | 79.1 (16.0-585.0) <sup>a</sup> | 0.83 (0.10-4.09) <sup>a</sup> | 164 (100-670) <sup>a</sup> | 70.6 <sup>d</sup>                 | 38.1 <sup>d</sup>     | 39.6 <sup>a</sup>      | 64.9 <sup>a</sup>    | 153 (62.5%) <sup>a</sup> | 66 (26.8%) <sup>a</sup> |
|                     | African Americans  | 27.6±1.1     | 35.9±1.3 <sup>a</sup>     | 8.9±0.6 <sup>a</sup> | 1821 (311-4876) <sup>a</sup>   | 77.2 (15.0-144.0) <sup>a</sup> | 0.80 (0.24-1.70) <sup>a</sup> | 166 (100-370) <sup>a</sup> | 79.6 <sup>d</sup>                 | 25.0                  | 34.1 <sup>a</sup>      | 64.3 <sup>a</sup>    | 32 (72.7%) <sup>a</sup>  | 15 (34.4%) <sup>a</sup> |
| Unselected PCOS     | All                | 27.4±0.7     | 27.6±1.0                  | 5.7±0.5 <sup>c</sup> | 1726 (231-5473) <sup>b</sup>   | 59.5 (11.0-160.0) <sup>b</sup> | 0.46 (0.05-1.91) <sup>b</sup> | 233 (70-820) <sup>c</sup>  | 65.6 <sup>b</sup>                 | 34.4 <sup>b</sup>     | 18.0 <sup>b</sup>      | 24.1 <sup>b</sup>    | 18 (28.1%)               | 7 (10.9%)               |
|                     | non-Hispanic White | 28.2±1.2     | 27.0±1.7                  | 4.5±0.7 <sup>c</sup> | 1859 (659-4913) <sup>b</sup>   | 63.5 (38.0-160.0) <sup>b</sup> | 0.45 (0.16-1.80) <sup>b</sup> | 247 (70-580) <sup>c</sup>  | 55.2 <sup>b</sup>                 | 34.5 <sup>b</sup>     | 17.2 <sup>b</sup>      | 20.7 <sup>b</sup>    | 8 (27.6%)                | 4 (13.8%)               |
|                     | African Americans  | 26.9±0.9     | 28.3±1.3                  | 6.7±0.8 <sup>c</sup> | 1574 (231-5473) <sup>b</sup>   | 56.0 (11.0-160.0) <sup>b</sup> | 0.45 (0.05-1.91) <sup>b</sup> | 222 (110-820) <sup>c</sup> | 73.5 <sup>b</sup>                 | 32.3 <sup>b</sup>     | 19.4 <sup>b</sup>      | 28.6 <sup>b</sup>    | 10 (29.4%)               | 3 (8.8%)                |
| Unselected Controls | All                | 29.3±0.3     | 27.3±0.3                  | 1.1±0.1              | 897 (70-9460)                  | 44.5 (4.0-123.0)               | 0.29 (0.02-1.15)              | 292 (100-5800)             | 2                                 | 2.6                   | 2.5                    | 5.1                  | 160 (28.4%)              | 42 (7.5%)               |
|                     | non-Hispanic White | 28.5±0.4     | 24.9±0.4                  | 0.9 ±0.1             | 922 (70-9460)                  | 46.03 (8.0-123.0)              | 0.27 (0.03-1.15)              | 328 (100-1590)             | 2.4                               | 5.4                   | 1.6                    | 4.0                  | 39 (15.4%)               | 7 (2.8%)                |
|                     | African Americans  | 29.9±0.4     | 29.6±0.5 <sup>f</sup>     | 1.3±0.1 <sup>g</sup> | 856 (85-3708)                  | 43.19 (4.0-120.0)              | 0.32 (0.02-1.11) <sup>h</sup> | 260 (120-580) <sup>i</sup> | 1.7                               | 5.5                   | 3.5                    | 6.4                  | 120 (40.8%) <sup>f</sup> | 35 (11.9%) <sup>f</sup> |

Abbreviations: BMI is body mass index, DHEAS is dehydroepiandrosterone sulfate, mFG score is the modified Ferriman-Gallwey hirsutism score, Oligo is oligo/anovulation, SHBG is sex hormone-binding globulin, T is testosterone.

\*Values depicted are means ±SE.

<sup>z</sup>The geometric mean, the antilog of the log scale mean, is reported for log-transformed data.

<sup>a</sup>p<0.0001 (Referral PCOS different than all others )

<sup>b</sup>p<0.0001 (Unselected PCOS vs. unselected controls only)

<sup>c</sup>p<0.001 (Unselected PCOS vs.unselected controls only)

<sup>d</sup>p<0.0001 (Referral vs. unselected controls only)

<sup>e</sup>p<0.001 (Referral vs. unselected PCOS )

<sup>f</sup>p<0.0001 (BMI, prevalence of obesity in AA > non-HW in unselected control only)

<sup>g</sup>p<0.05 (mFG score in AA > non-HW in all the three groups)

<sup>h</sup>p<0.05 (Free T in AA > non-HW in unselected control only)

<sup>i</sup>p<0.001 (SHBG in AA < non-HW in unselected control only)

| <b>Table 1. Comparison of study populations</b> |                                |                                |                            |
|-------------------------------------------------|--------------------------------|--------------------------------|----------------------------|
|                                                 | <b>Referral PCOS</b>           | <b>Unselected PCOS</b>         | <b>Unselected Controls</b> |
| <b>No. of total group (%)</b>                   | 292                            | 64                             | 563                        |
| <b>Mean Age (years)</b>                         | 27.44±0.44                     | 27.43±0.73                     | 29.25±0.30                 |
| <b>No. of non-Hispanic White (%)</b>            | 245.0 (83.9%) <sup>a</sup>     | 29.0 (45.3%)                   | 254.0 (45.0%)              |
| <b>No. of African American (%)</b>              | 44.0 (22.9%) <sup>a</sup>      | 34.0 (53.1%)                   | 299.0 (52.9%)              |
| <b>Mean BMI (kg/M<sup>2</sup>)</b>              | 34.50±0.55 <sup>a</sup>        | 27.58±1.01                     | 27.27±0.31                 |
| <b>Prevalence of Obesity (%)</b>                | 186.0 (63.7%) <sup>a</sup>     | 18.0 (28.1%)                   | 160.0 (28.4%)              |
| <b>Hirsutism (mFG) score</b>                    | 8.01±0.26 <sup>a</sup>         | 5.73±0.52 <sup>c</sup>         | 1.09±0.07                  |
| <b>Total T (ng/dL)<sup>*</sup></b>              | 77.9 (14.0-586.0) <sup>a</sup> | 59.5 (11.0-160.0) <sup>b</sup> | 44.5 (4.0-123.0)           |
| <b>Free T (ng/dL)<sup>*</sup></b>               | 0.83 (0.10-4.09) <sup>a</sup>  | 0.46 (0.05-1.91) <sup>b</sup>  | 0.29 (0.02-1.15)           |
| <b>DHEAS (ng/ml)<sup>*</sup></b>                | 1948 (92-6692) <sup>a</sup>    | 1726 (231-5473) <sup>b</sup>   | 897 (70-9460)              |
| <b>SHBG (nmol/L)<sup>*</sup></b>                | 164 (100-670) <sup>a</sup>     | 233 (70-820) <sup>c</sup>      | 291 (100-5800)             |
| <b>Hirsutism (mF-G ≥6; %)</b>                   | 72.3% <sup>d</sup>             | 65.6% <sup>b</sup>             | 2.0%                       |
| <b>Total T (%)</b>                              | 39.0% <sup>a</sup>             | 18.0% <sup>b</sup>             | 2.5%                       |
| <b>Free T (%)</b>                               | 64.0% <sup>a</sup>             | 24.1% <sup>b</sup>             | 5.1%                       |
| <b>DHEAS (%)</b>                                | 35.7% <sup>d</sup>             | 34.4% <sup>b</sup>             | 2.6%                       |
| <b><i>PCOS subphenotypes</i></b>                |                                |                                |                            |

|                                    |                            |              |     |
|------------------------------------|----------------------------|--------------|-----|
| <b>Hirsutism+Oligo only (%)</b>    | 58.0 (19.9%) <sup>a</sup>  | 29.0 (45.3%) | N/A |
| <b>HA+Oligo only (%)</b>           | 80.0 (27.4%)               | 22.0 (34.4%) | N/A |
| <b>Hirsutism+HA+Oligo only (%)</b> | 154.0 (52.7%) <sup>a</sup> | 13.0 (20.3%) | N/A |

*Values depicted are means ±SE.*

*\*Geometric mean, the antilog of the log scale mean, is reported for log-transformed data.*

*Abbreviations: BMI is body mass index, DHEAS is dehydroepiandrosterone sulfate, HA is hyperandrogenemia, mFG score is the modified Ferriman-Gallwey hirsutism score, Oligo is oligo/anovulation, SHBG is sex hormone-binding globulin, T is testosterone,*

<sup>a</sup>*p*<0.0001 (Referral different from all others )

<sup>b</sup>*p*<0.0001 (Unselected PCOS different from unselected controls)

<sup>c</sup>*p*<0.001 (Unselected PCOS different from unselected controls)

<sup>d</sup>*p*<0.0001 (Referral PCOS different from unselected controls only)

| <b>Table 2. Observed distribution (%) of referral PCOS, unselected PCOS and unselected controls by BMI categories</b> |                           |                 |                     |                                                     |                                                         |                                                              |
|-----------------------------------------------------------------------------------------------------------------------|---------------------------|-----------------|---------------------|-----------------------------------------------------|---------------------------------------------------------|--------------------------------------------------------------|
| <b>BMI categories</b>                                                                                                 | Referral PCOS             | Unselected PCOS | Unselected Controls | Odds ratios                                         | Odds ratios                                             | Odds ratios                                                  |
|                                                                                                                       | (n=292)                   | (n=64)          | (n=563)             | (95% CI)                                            | (95% CI)                                                | (95% CI)                                                     |
|                                                                                                                       | n (%)                     | n (%)           | n (%)               | comparing<br>referral PCOS to<br>unselected<br>PCOS | comparing<br>referral PCOS to<br>unselected<br>controls | comparing<br>unselected<br>PCOS to<br>unselected<br>controls |
| <b>Underweight</b><br>( $\leq 18.9$ kg/M <sup>2</sup> )                                                               | 4.0 (1.4) <sup>a</sup>    | 3.0 (4.7)       | 33.0 (5.9)          | 0.28<br>(0.05 to 1.99)                              | 0.22 <sup>a</sup><br>(0.06 to 0.64)                     | 0.79<br>(0.15 to 2.64)                                       |
| <b>Normal</b><br>(19.0–24.9 kg/M <sup>2</sup> )                                                                       | 48.0 (16.4) <sup>b</sup>  | 27.0 (42.2)     | 237.0 (42.1)        | 0.27 <sup>b</sup><br>(0.15 to 0.51)                 | 0.27 <sup>b</sup><br>(0.19 to 0.39)                     | 1<br>(0.57 to 1.75)                                          |
| <b>Overweight</b><br>(25.0–29.9 kg/M <sup>2</sup> )                                                                   | 54.0 (18.5)               | 16 (25)         | 133.0 (23.6)        | 0.68<br>(0.35 to 1.39)                              | 0.74<br>(0.51 to 1.04)                                  | 0.68<br>( 0.35 to 1.35)                                      |
| <b>Obese</b><br>( $\geq 30.0$ kg/M <sup>2</sup> )                                                                     | 186.0 (63.7) <sup>b</sup> | 18.0 (28.1 )    | 160.0 (28.4)        | 2.95 <sup>b</sup><br>(1.02 to 11.68)                | 4.41 <sup>b</sup><br>(3.24 to 6.04)                     | 0.99<br>( 0.52 to 1.80)                                      |
| <b>Obesity by class</b>                                                                                               |                           |                 |                     |                                                     |                                                         |                                                              |

|                                                          |                           |                        |             |                                     |                                     |                        |
|----------------------------------------------------------|---------------------------|------------------------|-------------|-------------------------------------|-------------------------------------|------------------------|
| <b>Class I obesity<br/>(30.0–34.9 kg/M<sup>2</sup>)</b>  | 48.0 (16.4)               | 4.0 (6.3) <sup>c</sup> | 72.0 (12.8) | 1.97 <sup>c</sup><br>(0.84 to 5.40) | 1.34<br>(0.88 to 2.03)              | 1.05<br>(0.52 to 1.98) |
| <b>Class II obesity<br/>(35.0–39.9 kg/M<sup>2</sup>)</b> | 57.0 (19.5) <sup>b</sup>  | 7.0 (10.9)             | 46.0 (8.2)  | 3.12<br>(1.34 to 8.44)              | 2.72 <sup>b</sup><br>(1.76 to 4.24) | 1.38<br>(0.50 to 3.27) |
| <b>Class III obesity<br/>(≥ 40.0 kg/M<sup>2</sup>)</b>   | 81.0 (27.7) <sup>bd</sup> | 7.0 (10.9)             | 42.0 (7.5)  | 4.47 <sup>d</sup><br>(2.40 to 8.63) | 4.75 <sup>b</sup><br>(3.12 to 7.32) | 1.52<br>(0.55 to 3.64) |

<sup>a</sup> $p < 0.001$  (Referral PCOS vs. unselected control [underweight BMI])

<sup>b</sup> $p < 0.0001$  (Referral PCOS vs. unselected PCOS or unselected control)

<sup>c</sup> $p < 0.05$  (Referral PCOS vs. unselected PCOS [mild obesity])

<sup>d</sup> $p < 0.01$  (Referral PCOS vs. unselected PCOS [severe obesity])

| <b>Table 3. The characteristics of phenotypes of PCOS based on NIH criteria in referral and unselected PCOS</b> |                               |                           |                               |                               |                   |                   |
|-----------------------------------------------------------------------------------------------------------------|-------------------------------|---------------------------|-------------------------------|-------------------------------|-------------------|-------------------|
|                                                                                                                 | <b>Referral PCOS (n=292)</b>  |                           |                               | <b>Unselected PCOS (n=64)</b> |                   |                   |
|                                                                                                                 | <b>Hirsutism+</b>             | <b>HA+Oligo</b>           | <b>Hirsutism+</b>             | <b>Hirsutism+</b>             | <b>HA+Oligo</b>   | <b>Hirsutism+</b> |
|                                                                                                                 | <b>Oligo</b>                  |                           | <b>HA+Oligo</b>               | <b>Oligo</b>                  |                   | <b>HA+Oligo</b>   |
| <b>No. of total group (%)</b>                                                                                   | 58.0 (19.9%)                  | 80.0 (27.4%)              | 154.0 (52.7%)                 | 29.0 (45.3%)                  | 22 (34.4%)        | 13 (20.3%)        |
| <b>Mean Age (years)</b>                                                                                         | 30.1±1.0                      | 27.9±0.8                  | 26.2±1.0                      | 29.3±1.0                      | 26.2±1.1          | 25.5±1.6          |
| <b>No. non-NHW (%)</b>                                                                                          | 49.0 (84.5%)                  | 71.0 (88.8%)              | 125.0 (81.2)                  | 13.0 (44.8%)                  | 13 (59.1%)        | 3 (23.1%)         |
| <b>No. AA (%)</b>                                                                                               | 8 (13.8%)                     | 9.0 (11.3%)               | 27.0 (17.5%)                  | 16.0 (55.2%)                  | 9 (40.9%)         | 9 (69.2%)         |
| <b>Mean BMI (kg/m<sup>2</sup>)</b>                                                                              | 34.8±1.3 <sup>d</sup>         | 33.5±1.1 <sup>c</sup>     | 34.9±0.7                      | 26.9±1.5                      | 26.9±1.8          | 30.2±2.3          |
| <b>No. with Obesity (%)</b>                                                                                     | 36.0 (62.1%) <sup>c</sup>     | 48.0 (60.0%) <sup>b</sup> | 102.0 (66.2%) <sup>d</sup>    | 7.0 (24.1%)                   | 6 (27.3%)         | 5 (38.5%)         |
| <b>mFG score</b>                                                                                                | 9.5±0.4 <sup>b</sup>          | 3.1±0.2 <sup>c</sup>      | 10.0±0.3 <sup>d</sup>         | 7.9±0.4                       | 1.0±0.3           | 8.9±1.0           |
| <b>Total T (ng/dL) *</b>                                                                                        | 53.6 (16.0-83.0)              | 85.6 (27.0-219.0)         | 85.4 (14.0-586.0)<br>a        | 46.8 (11.0-74.0)              | 75.7 (38.0-160.0) | 64.1 (29.0-160)   |
| <b>Free T (ng/dL) *</b>                                                                                         | 0.53 (0.10-0.75) <sup>d</sup> | 0.89 (0.30 -1.75)         | 0.95 (0.24-4.09) <sup>c</sup> | 0.28 (0.05 -0.74)             | 0.70 (0.16-1.80)  | 0.63 (0.25-1.91)  |
| <b>DHEAS (ng/ml) *</b>                                                                                          | 1400                          | 2051                      | 2149 <sup>b</sup>             | 1222                          | 1864              | 3019              |
|                                                                                                                 | (234-2382)                    | (474-5189)                | (92-6692)                     | (231-2366)                    | (786-3560)        | (1145-5473)       |
| <b>SHBG (nmol/L)*</b>                                                                                           | 174 <sup>d</sup>              | 166                       | 159                           | 308                           | 188               | 183               |
|                                                                                                                 | (100-670)                     | (100-310)                 | (100-430)                     | (100-820)                     | (70 -540)         | (120-300)         |

|                    |     |                           |                            |     |               |              |
|--------------------|-----|---------------------------|----------------------------|-----|---------------|--------------|
| <b>Total T (%)</b> | 0.0 | 34.0 (42.5%)              | 60.0 (38.7%)               | 0.0 | 7/22 (31.8%)  | 4/13 (30.8%) |
| <b>Free T (%)</b>  | 0.0 | 70.0 (87.5%) <sup>c</sup> | 132.0 (85.2%) <sup>d</sup> | 0.0 | 13/22 (59.1%) | 4/13 (30.8%) |
| <b>DHEAS (%)</b>   | 0.0 | 23.0 (28.8%)              | 60.0 (38.7%)               | 0.0 | 5/22 (22.7%)  | 8/13 (61.5%) |

*Values depicted are means ±SE.*

*\*Geometric mean, the antilog of the log scale mean, is reported for log-transformed data.*

*Abbreviations: BMI is body mass index, DHEAS is dehydroepiandrosterone sulfate, HA is hyperandrogenemia, mFG score is the modified Ferriman-Gallwey hirsutism score, Oligo is oligo/anovulation, SHBG is sex hormone-binding globulin, T is testosterone,*

*p-values reflect the comparison of referral PCOS to unselected PCOS across analogous phenotypes*

<sup>a</sup>*p*<0.05

<sup>b</sup>*p*<0.01

<sup>c</sup>*p*<0.001

<sup>d</sup>*p*<0.0001
